# Supplementary material for: Restoration of impaired intestinal barrier function by the hydrolysed casein diet contributes to the prevention of type 1 diabetes in the diabetes-prone BioBreeding rat
Source: PubMed Central journal article supplement — Diabetologia. 2010 Sep 19;53(12):2621–8. doi: 10.1007/s00125-010-1903-9 (PMC2974912; doi:10.1007/s00125-010-1903-9), 2010-09-19
Supplement: 125_2010_1903_MOESM1_ESM.pdf [file 125_2010_1903_MOESM1_ESM.pdf]

## Electronic supplementary material

**ESM Table 1** Primer sequences

| Gene                           | Primer sequence (3'-5')                                               |
|--------------------------------|-----------------------------------------------------------------------|
| <i>Myo9b</i>                   | Forward CGCAGTCGTGTGAGCAGTGT<br>Reverse ACTCTTCCTCCGTCCAGTGT          |
| <i>Cldn1</i>                   | Forward ATTGGCATGAAGTGCATGAG<br>Reverse CCACTAATGTCGCCAGACCT          |
| <i>Cldn2</i>                   | Forward GCTCCGTGAGTATCTGCTCTG<br>Reverse TCACAGTGTCTCTGGCAAGC         |
| <i>Ocln</i>                    | Forward CCATGTCTGTGAGGCCTTTT<br>Reverse AAAGAGTATGCCGGCTGAGA          |
| <i>Ifn-<math>\gamma</math></i> | Forward TATCTGGAGGAACTGGCAAAAG<br>Reverse TCGGATTCGATGACACTTATGT      |
| <i>Il-10</i>                   | Forward CCTGCTCTTACTGGCTGG<br>Reverse TGTCCAGCTGGTCCTTCTTT            |
| <i>Tgf-<math>\beta</math></i>  | Forward GACCGCAACAACGCAATCTA<br>Reverse ACCAAGGTAACGCCAGGAAT          |
| <i>Tnf-<math>\alpha</math></i> | Forward TACTGAACTTCGGGGTGATTGGTCC<br>Reverse CAGCCTTGTCCCTTGAAGAGAACC |
| <i>Hprt</i>                    | Forward GCGAAAGTGGAAAAGCCAAGT<br>Reverse GCCACATCAACAGGACTCTTGTA      |
