# Supplementary figures and images for: Restoration of impaired intestinal barrier function by the hydrolysed casein diet contributes to the prevention of type 1 diabetes in the diabetes-prone BioBreeding rat
Source: Springer Nature journal article supplement (doi:10.1007/s00125-010-1903-9), 2010-09-18

**a**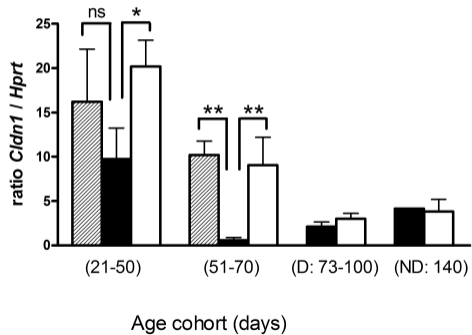**b**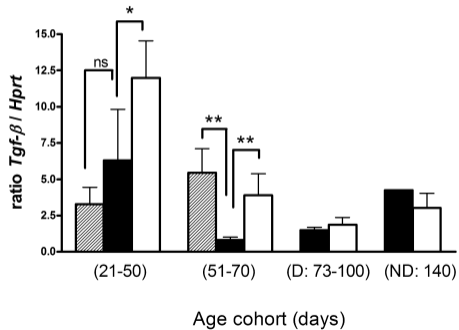

Supplement: MOESM2 [file 8089506]
